# Supplementary material for: Gα11 mutation in mice causes hypocalcemia rectifiable by calcilytic therapy
Source: PubMed Central journal article supplement (PMC5291742; doi:10.1172/jci.insight.91103), 2017-02-09
Supplement: jciinsight-2-91103-s001.pdf [file jciinsight-2-91103-s001.pdf]

**Supplementary Table 1. Proportion of offspring bred from crosses of *Dsk7/+* x *Dsk7/+* mice**

| Genotype         | Expected number of offspring (n=584 born) | Observed number of offspring (n=482 weaned) |
|------------------|-------------------------------------------|---------------------------------------------|
| +/+              | 146 (25%)                                 | 128 (27%)                                   |
| <i>Dsk7/+</i>    | 292 (50%)                                 | 272 (56%)                                   |
| <i>Dsk7/Dsk7</i> | 146 (25%)                                 | 82 (17%)                                    |

Chi-square analysis showed the observed proportion of offspring to be different from those expected ( $\chi^2=10.20$ ,  $df = 2$ ,  $P < 0.01$ ), with significantly fewer *Dsk7/Dsk7* mice being bred.

## Supplementary Figure 1

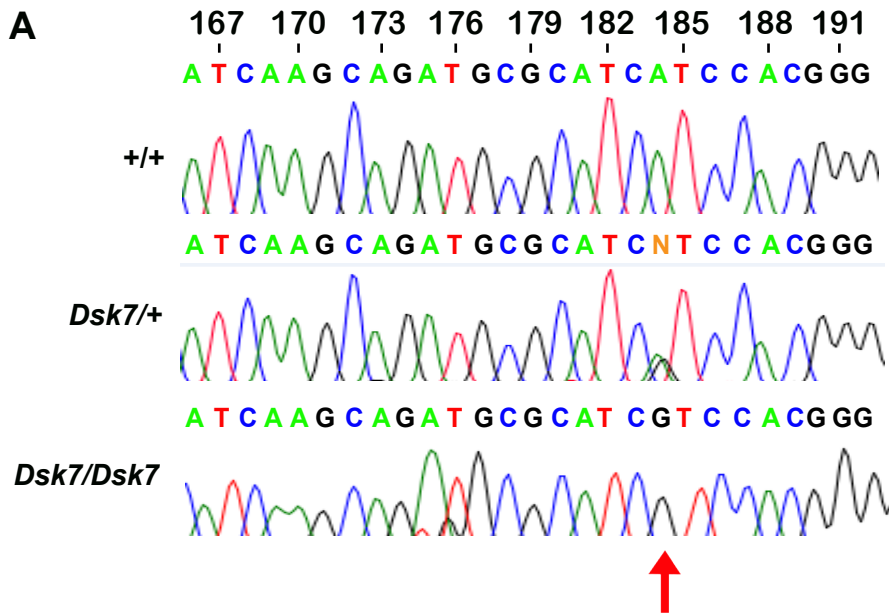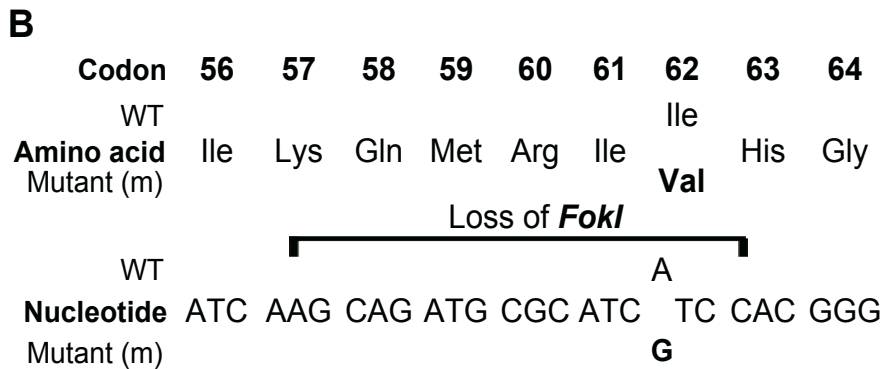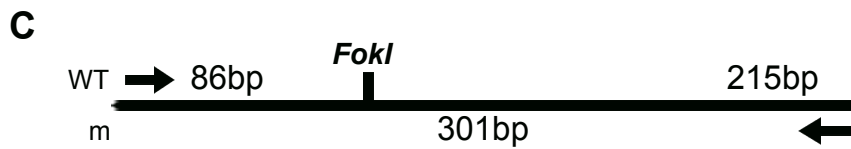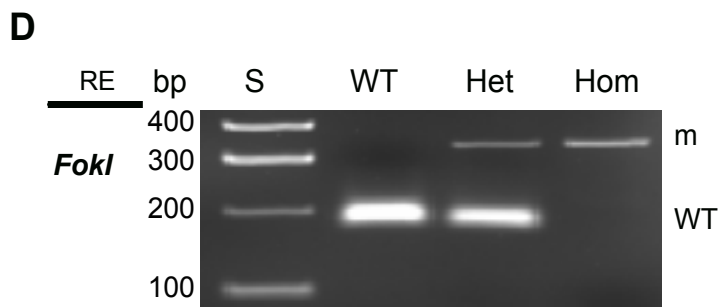

### Supplementary Figure 1. DNA sequence and restriction endonuclease analysis of the Val62 $\alpha$ 11 mutation.

(A) DNA sequence analysis showed an A-to-G transition at c.184 (red arrow) within exon 2 of *Gna11*. (B) This sequence abnormality was predicted to lead to a missense substitution of Ile to Val at codon 62, resulting in the loss of a *FokI* restriction endonuclease (RE) site. (C) Restriction maps showing *FokI* digest would result in two products of 66bp and 160bp for the WT, and one 226bp product for the mutant (m). (D) RE digest of *Gna11* exon 2 PCR products demonstrating the A-to-G transition in *Dsk7*/+ and *Dsk7*/*Dsk7* mice. S = size marker.

## Supplementary Figure 2

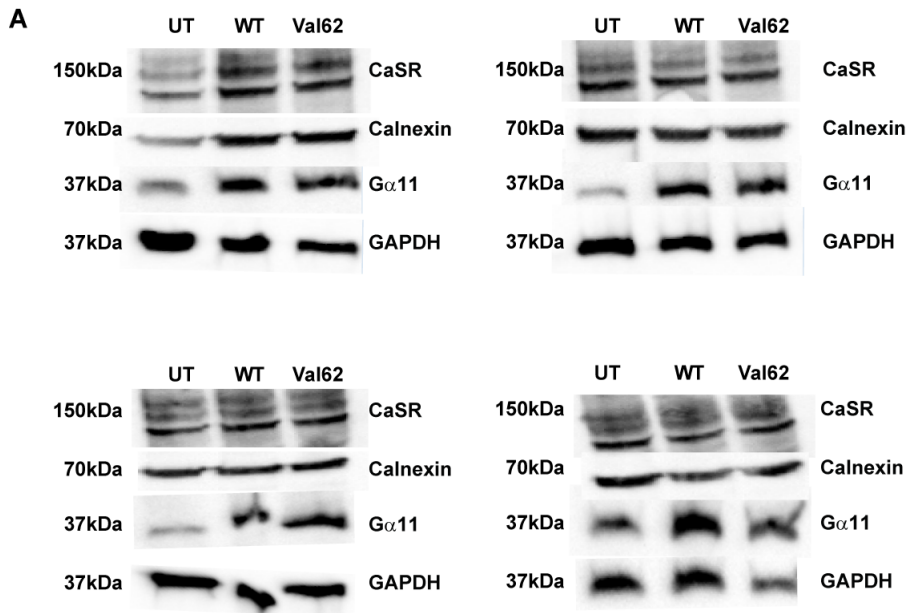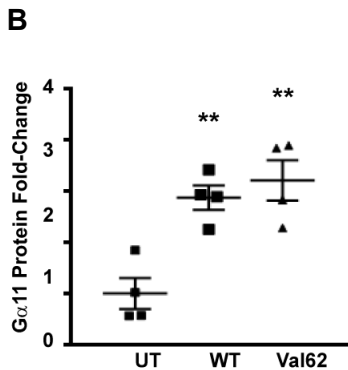

**Supplementary Figure 2. Cells transiently transfected with WT and mutant Val62 pBI-CMV2-GNA11 constructs overexpress the G $\alpha_{11}$  protein.** (A) Four separate Western blots of lysates from HEK-CaSR cells transiently expressing WT (Ile62) or mutant (Val62) pBI-CMV2-GNA11 constructs. Transient transfection with WT or mutant Val62 expression constructs resulted in overexpression of G $\alpha_{11}$  compared to untransfected cells (UT). GAPDH was used as a housekeeping protein for G $\alpha_{11}$  blots, and calnexin for CaSR blots. (B) Densitometric analysis of G $\alpha_{11}$  protein levels in each of the blots. G $\alpha_{11}$  expression was normalized to levels of GAPDH and expressed as a fold-change of G $\alpha_{11}$  expression in UT cells. G $\alpha_{11}$  was significantly overexpressed in transfected cells compared to UT cells. The expression of mutant G $\alpha_{11}$  with endogenous WT G $\alpha_{11}$  in transfected cells corresponded to the heterozygous situation *in vivo*. Data is expressed as mean $\pm$ SEM of the 4 blots which represent 4 independent lysates. Statistical analyses were performed using two-way ANOVA. \*\*P<0.01.

### Supplementary Figure 3

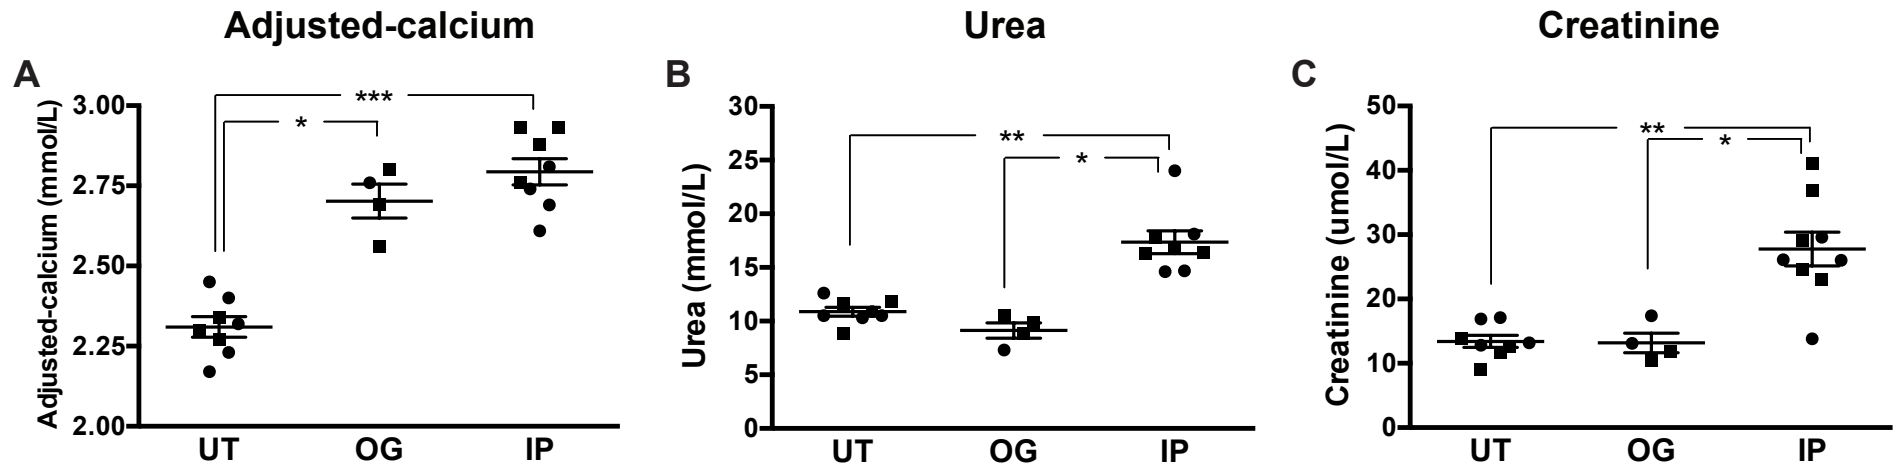

**Supplementary Figure 3. Comparison of route of administration of NPS-2143 on plasma calcium and renal function in WT mice.** (A) plasma adjusted-calcium, (B) plasma urea, and (C) plasma creatinine concentrations of untreated (UT) WT mice, and of WT mice given NPS-2143 by oral gavage (OG) or intraperitoneal (IP) injection. Plasma biochemistry was measured at 1hr post-dose in NPS-2143-treated mice. Mean±SEM values for the respective groups are indicated by solid bars. Squares, males; circles, females. \*P < 0.05, \*\*P < 0.01, \*\*\*P < 0.001. A Kruskal-Wallis test followed by Dunn's test for non-parametric pairwise multiple comparisons were used for analysis of A-C.

## Supplementary Figure 4

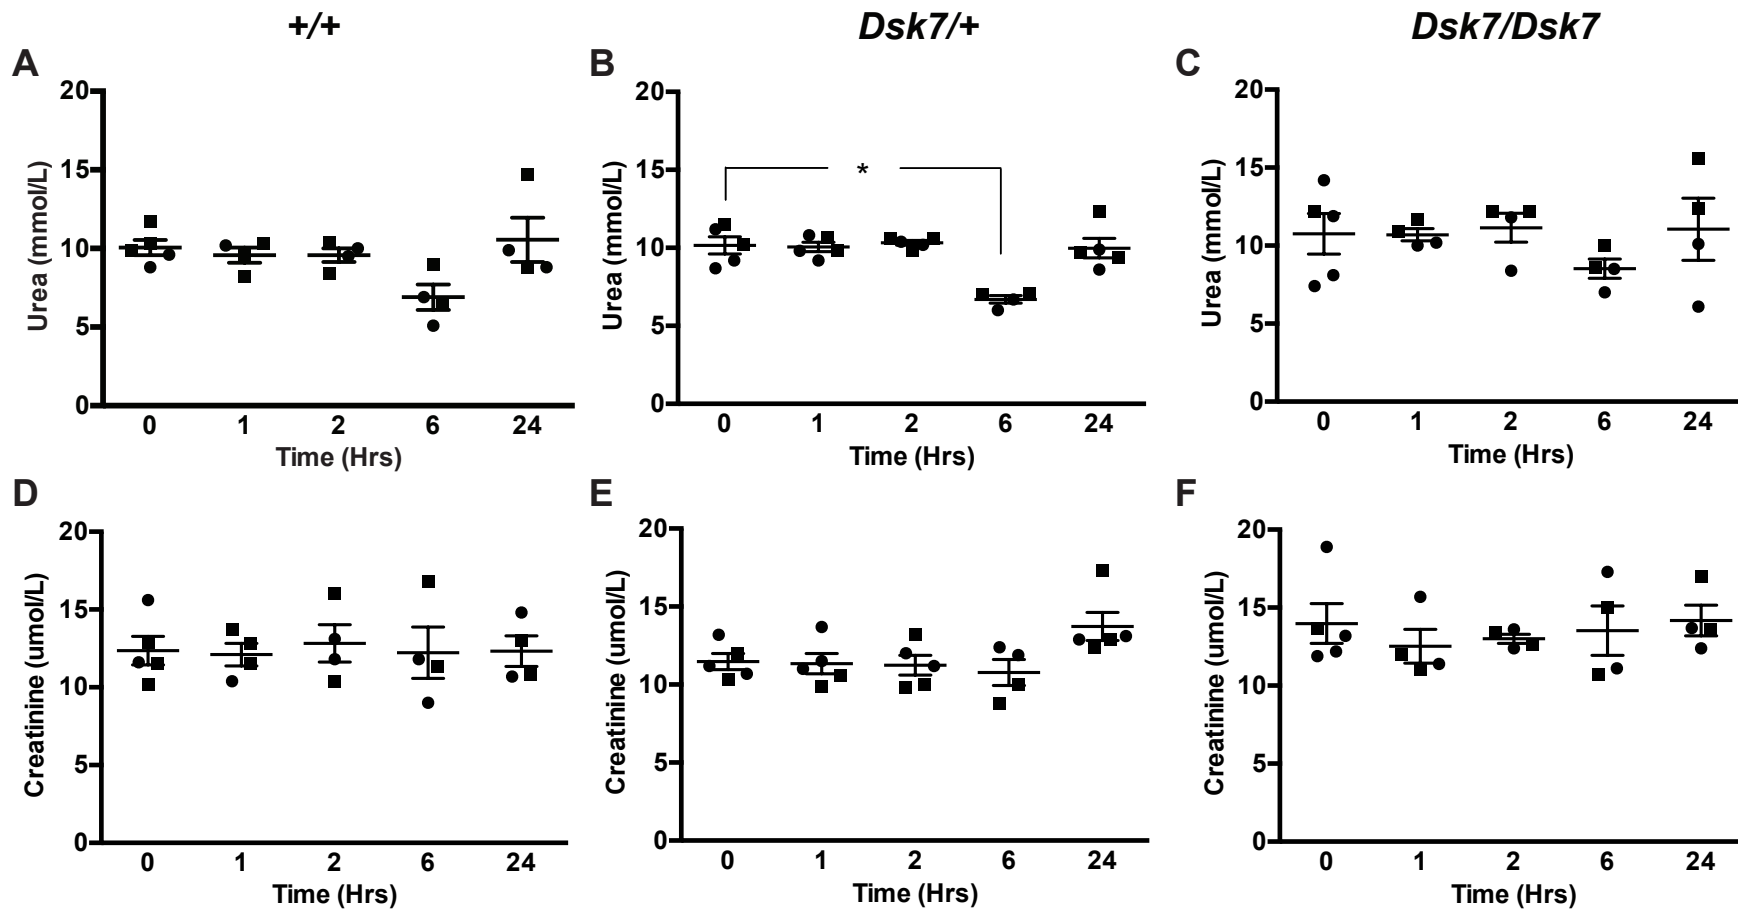

**Supplementary Figure 4. Effect of NPS-2143 on plasma urea and creatinine of WT and Dsk7 mice at 0, 1, 2, 6 and 24hrs post-dose.** (A-C) plasma urea and (D-F) plasma creatinine concentrations of WT (+/+), Dsk7/+ and Dsk7/Dsk7 mice, respectively. Mean±SEM values for the respective groups are indicated by solid bars. N=4-5 mice per study time-point. Squares, males; circles, females. \*P < 0.05. A Kruskal-Wallis test followed by Dunn's test for non-parametric pairwise multiple comparisons were used for analysis of A-F.

## Supplementary Figure 5

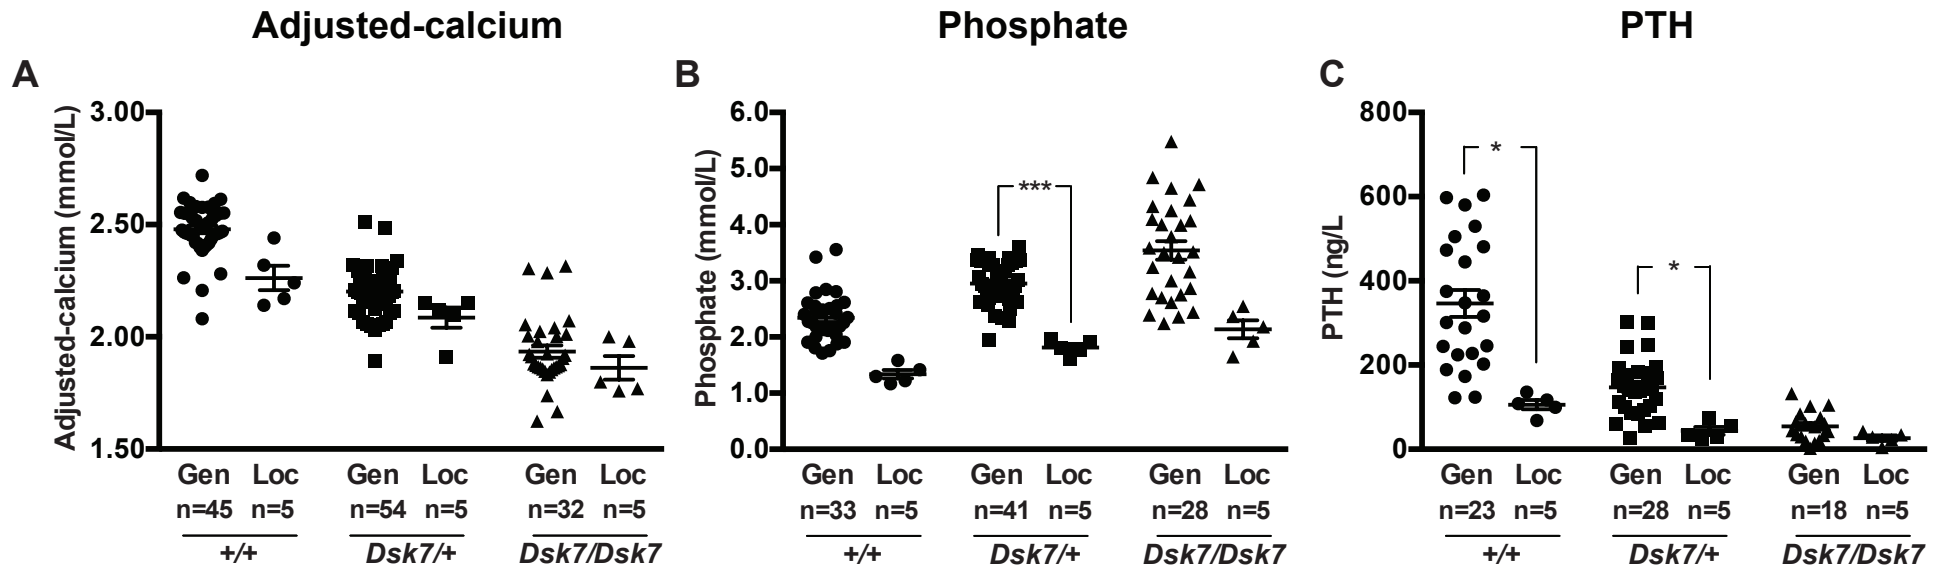

**Supplementary Figure 5. Comparison of effect of isoflurane general anesthesia versus topical local anesthesia on plasma concentrations of calcium, phosphate and PTH.** (A) plasma adjusted-calcium, (B) plasma phosphate, and (C) plasma PTH concentrations of +/+ (WT), Dsk7/+ and Dsk7/Dsk7 mice. Mean±SEM values for the respective groups are indicated by solid bars. Circles, +/+ mice; squares, Dsk7/+ mice; triangles, Dsk7/Dsk7 mice. Gen, general isoflurane anesthesia; Loc, local anesthesia. \*P < 0.05, \*\*\*P < 0.001. A Kruskal-Wallis test followed by Dunn's test for non-parametric pairwise multiple comparisons were used for analysis of A-C.
